# Supplementary material for: Predicting in-hospital mortality using routine parameters in unselected nonsurgical emergency department patients
Source: Springer Nature journal article supplement (doi:10.1007/s10049-015-0055-3), 2015-09-03
Supplement: MOESM1 [file 11092904]

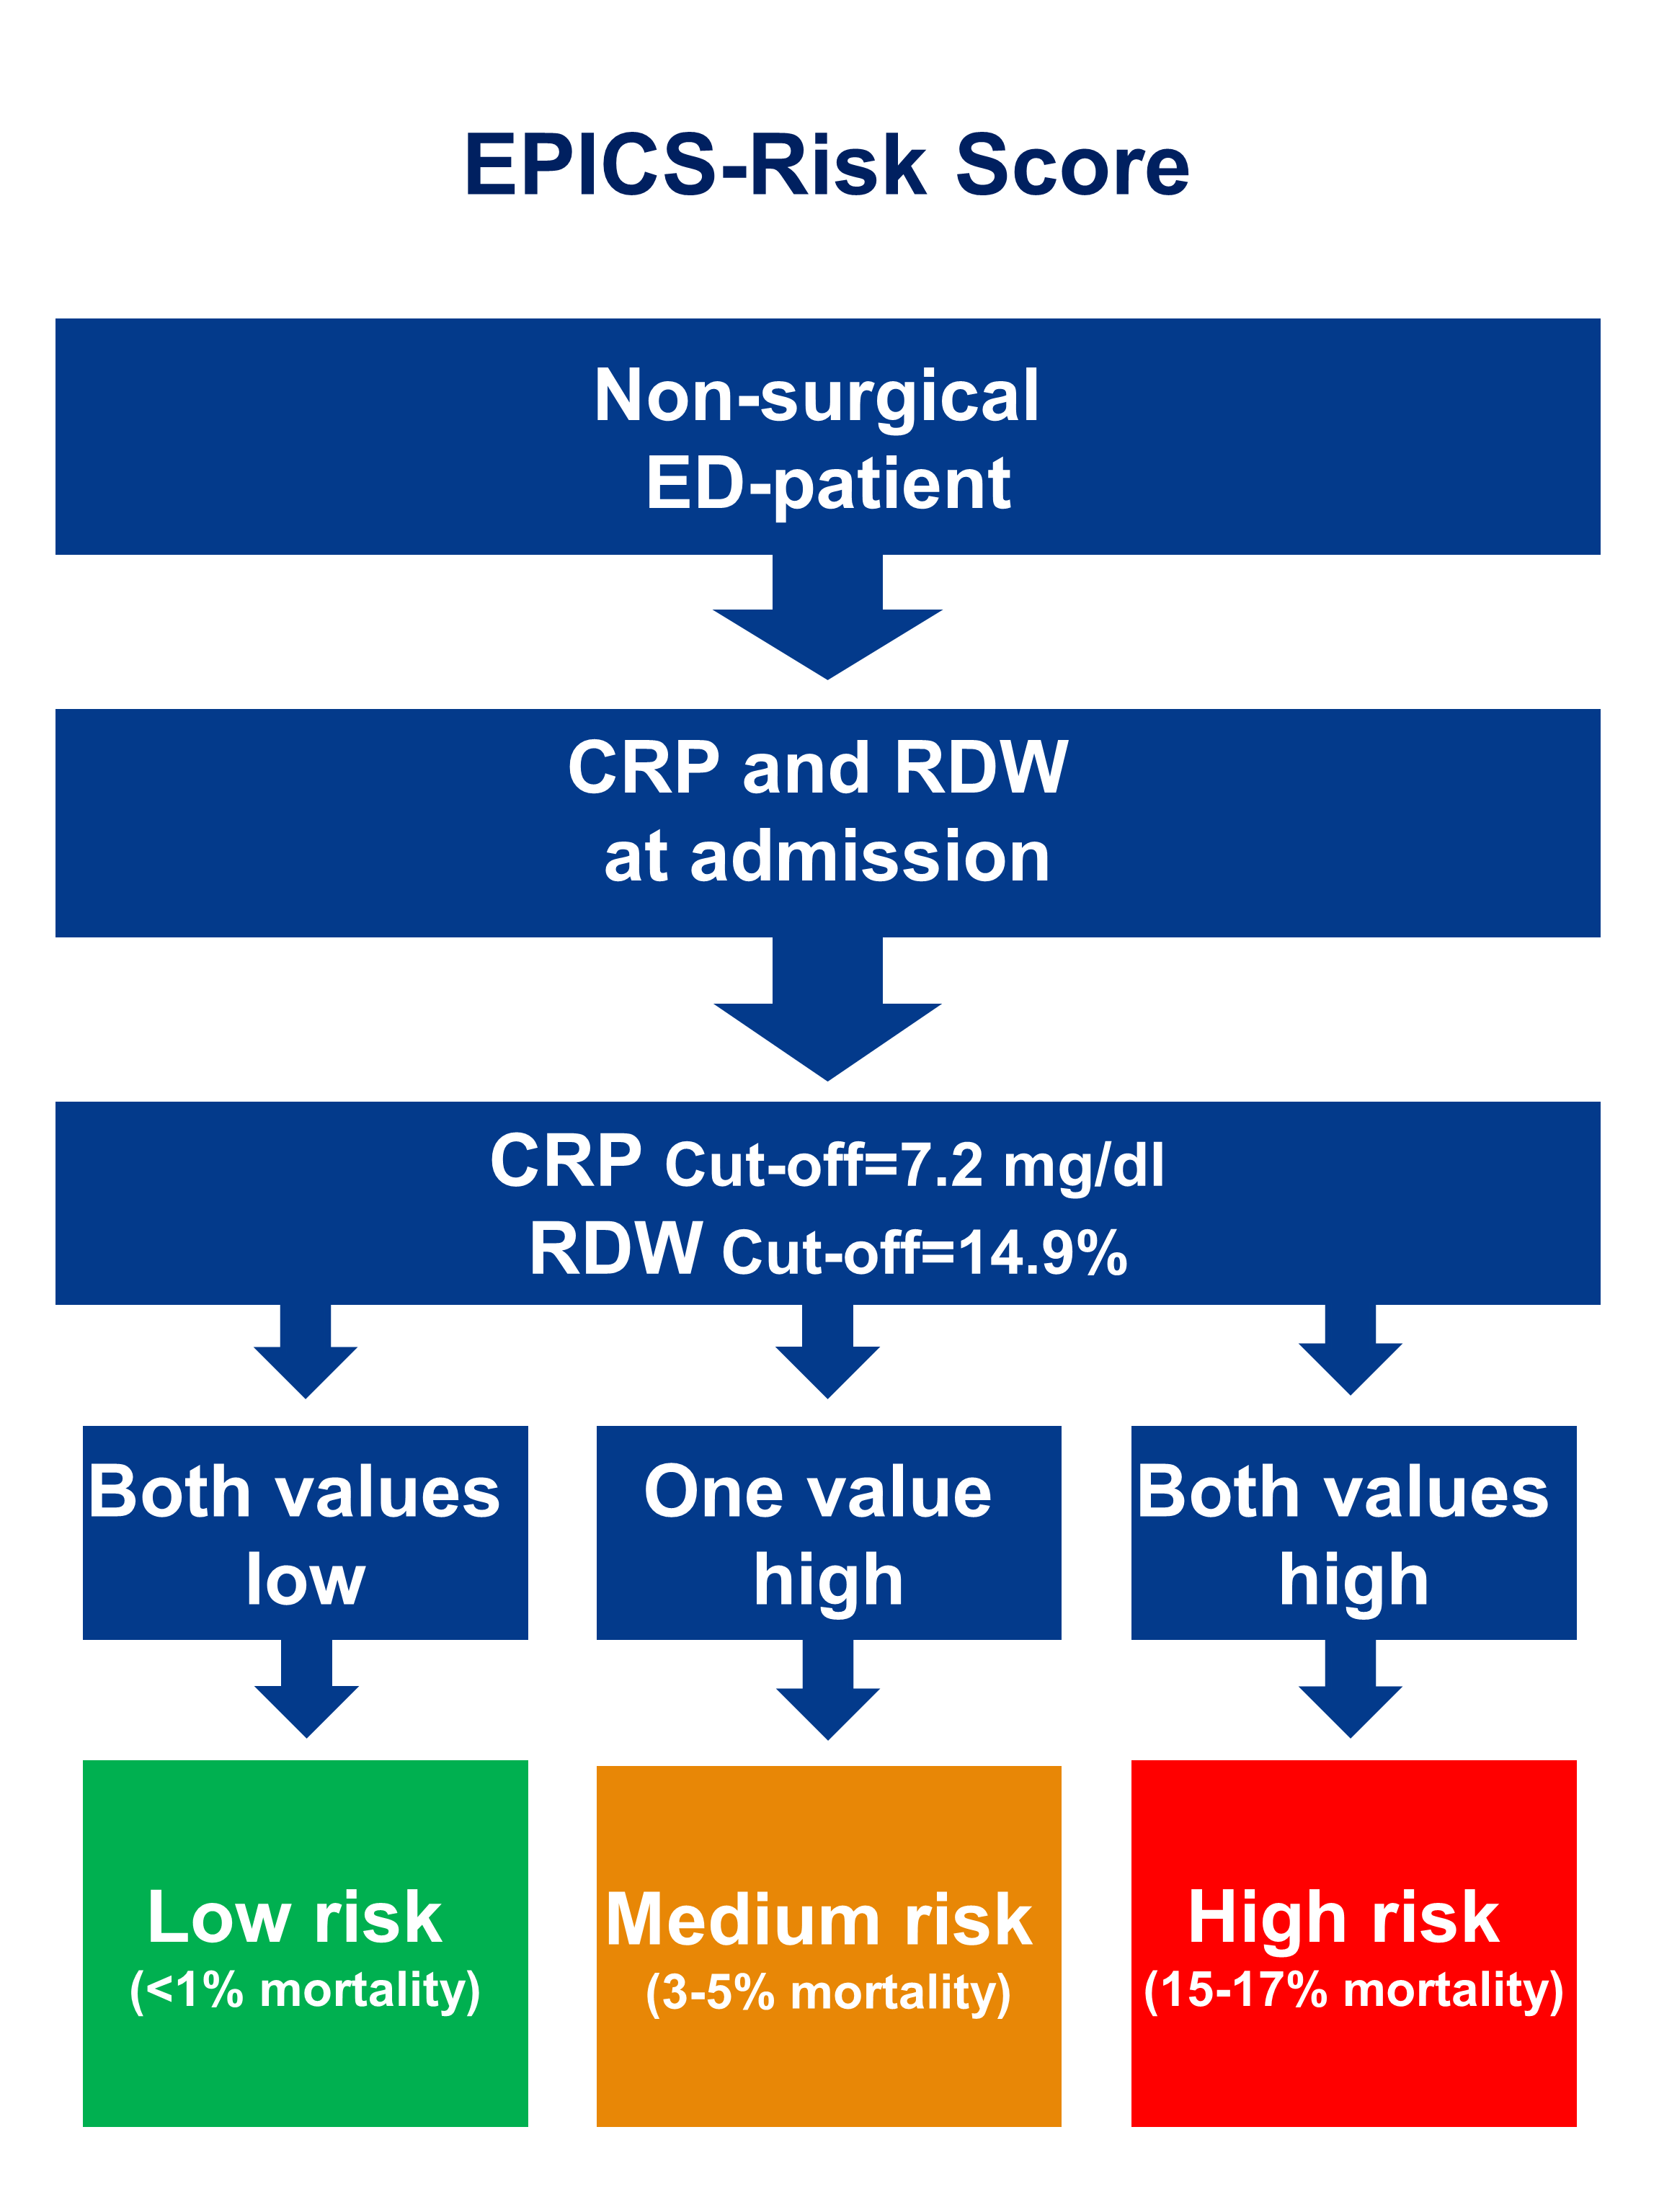


Supplementary Figure 1: Suggested score for the implementation of study results into clinical practice. This score needs to be validated in a prospective multicenter trial before clinical use can be
