# Supplementary material for: Predicting in-hospital mortality using routine parameters in unselected nonsurgical emergency department patients
Source: Springer Nature journal article supplement (doi:10.1007/s10049-015-0055-3), 2015-09-03
Supplement: MOESM2 [file 10675372]

Supplementary Table 1. Correlation between all predictors in the final model as well as patient´s sex

|  | **CRP** | **RDW** | **RBC** | **Hb** | **Hct** | **Crea** | **Na** | **Age** | **WBC** | **K** | **Plat.** |
| --- | --- | --- | --- | --- | --- | --- | --- | --- | --- | --- | --- |
| Male sex |   *** | n.s. | n.s. |   ** | n.s. |   *** | n.s. | n.s. | n.s. |   *** |   *** |
| CRP  ≥ 7.19 mg/dl | - | 0.09    *** | 0.04  *** | 0.09    *** | 0.09    *** | 0.01    *** | 0.09    *** | 0.04  *** | 0.09    *** | 0.01    *** | 0    *** |
| RDW  ≥ 16.2% |  |  | 0.09    *** | 0.16    *** | 0.09    *** | 0.16  *** | 0.01    *** | 0.16    *** | 0.01    *** | 0.04    *** | 0    *** |
| RBC  ≥ 3.72 /pl |  |  |  | 0.64    *** | 0.81    *** | 0    *** | 0.04  *** | 0.09    *** | 0.01    *** | 0    *** | 0    *** |
| Hemoglobin  ≥ 10.9 g/dl |  |  |  |  | 0.92    *** | 0.01    *** | 0.04  *** | 0.04  *** | 0.01    *** | 0    *** | 0.01    *** |
| Hematocrit  ≥ 0.33 l/l |  |  |  |  |  | 0.01    *** | 0.04  *** | 0.04  *** | 0.01    *** | 0    *** | 0.01    *** |
| Creatinin  ≥ 1.47 mg/dl |  |  |  |  |  |  | 0.01    *** | 0.09    *** | 0.01    *** | 0.04    *** | 0.04    *** |
| Sodium  ≥ 132 mmol/l |  |  |  |  |  |  |  | 0.04  *** | 0.01    *** | 0.01    *** | 0    *** |
| Age  ≥ 63 years |  |  |  |  |  |  |  |  | 0    *** | 0.04  *** | 0.01    *** |
| WBC  ≥ 16.01 /nl |  |  |  |  |  |  |  |  |  | 0    *** | 0.09  n.s. |
| Potassium  ≥ 5 mmol/l |  |  |  |  |  |  |  |  |  |  | 0    *** |

The arrows show the direction and stars the significance of the association between binary predictors (***p<0.0001; **p<0.01; n.s.: p>0.05). Numbers show the squared coefficient of correlation (Spearman´s r) for numeric predictors. Highlighted are those associations with a coefficient of correlation above 0.3 and a p-value above 0.05
