# Supplementary material for: Predicting in-hospital mortality using routine parameters in unselected nonsurgical emergency department patients
Source: Springer Nature journal article supplement (doi:10.1007/s10049-015-0055-3), 2015-09-03
Supplement: MOESM3 [file 11092904]

Supplementary Table 2. Sensitivity analyses in the derivation data set (n=34,333)

| **Risk groups resulting from CRP (cut off ≥ 7.2 mg/dl) and RDW (cut off ≥ 14.9%)** | | | |
| --- | --- | --- | --- |
| ***Sensitivity analysis:*** *Short-term mortality within one day and within seven days* | | | |
|  | In-hospital mortality | 1-day mortality | 7-day mortality |
| **Both values low** | 0.6% (127/19,979) | 0.1 (27/19.979) | 0.4 (72/19,979) |
| **One value high:** |  |  |  |
| *Only CRP positive* | 4.3% (67/1,550) | 0.6% (10/1,550) | 1.8% (28/1,550) |
| *Only RDW positive* | 3.7% (180/4,811) | 0.6% (31/4,811) | 1.8% (87/4,811) |
| **Both values high** | 16.2% (193/1,194) | 3.8% (45/1,194) | 8.0% (96/1,194) |
| ***Sensitivity analysis:***  *in-patients only* | | | |
|  | In-hospital mortality | 1-day mortality | 7-day mortality |
| **Both values low** | 1.7% (127/7,381) | 0.4% (27/7,381) | 1.0% (72/7,381) |
| **One value high** |  |  |  |
| *Only CRP positive* | 7.0% (67/952) | 1.1% (10/952) | 2.9% (28/952) |
| *Only RDW positive* | 6.4% (180/2,808) | 1.1% (31/2,808) | 3.1% (87/2,808) |
| **Both values high** | 20.7% (193/934) | 4.8% (45/934) | 10.3% (96/934) |

In sensitivity analyses, the proposed risk score (supplement figure 1) was applied for short-term mortality and in in-patients only. Short-term mortality was analysed in two time-periods: (1) mortality within one day after admission and (2) mortality within 7 days after admission. Of all 634 patients with fatal outcome during their initial hospitalisation, 21.6% (n=137) died within the first day and 51.4% (n=326) within one week after admission.
